# Psychiatric Services

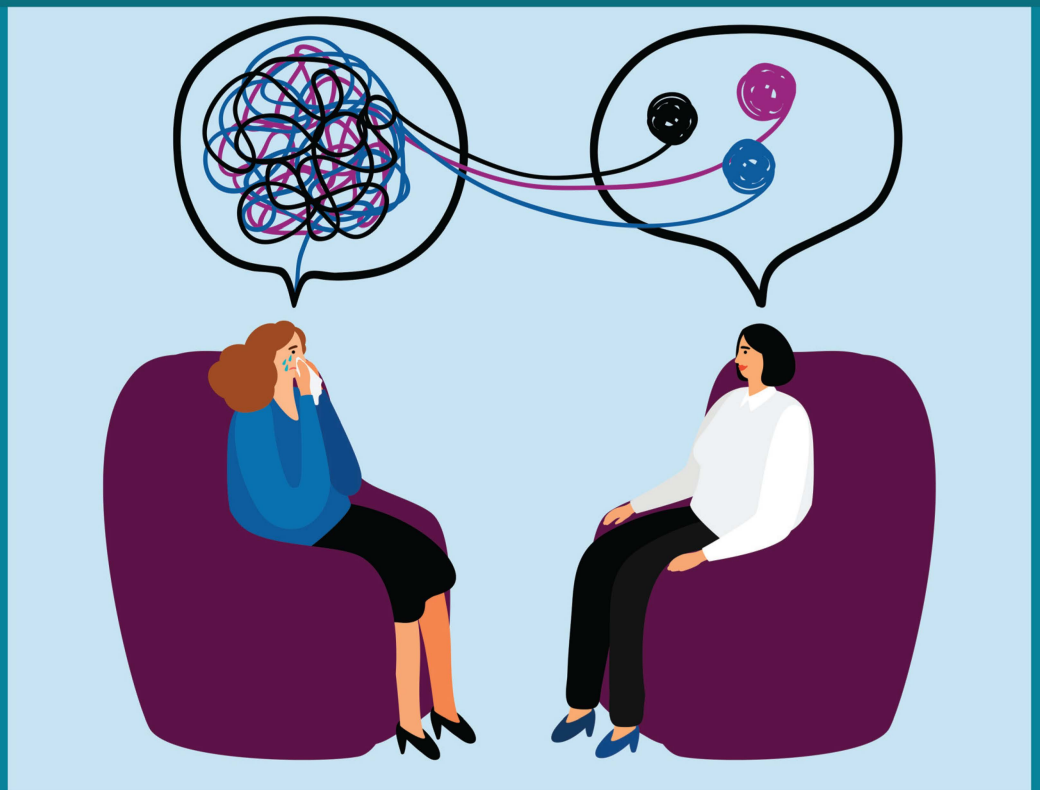

Open Forum: problem-focused psychodynamic psychotherapies  
Electronic health record adoption in hospital substance use disorder programs  
HIV testing in U.S. substance use treatment facilities: a missed opportunity  
The Bridge: advance directives initiative for clients with serious mental illness
