# PSYCHIATRYonline

Your Destination for Lifelong Learning in Psychiatry

The one-stop resource for information on diagnosis, treatment, guidelines, the latest research, and breaking news from the field.

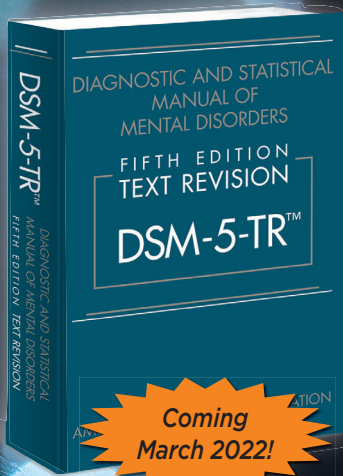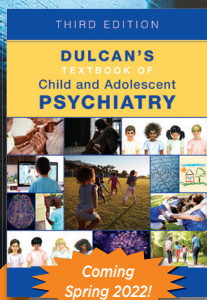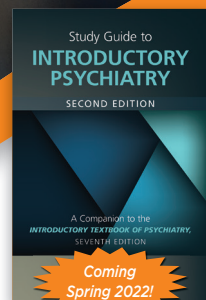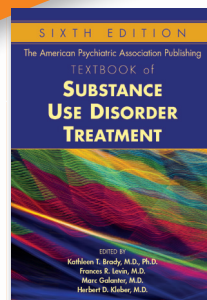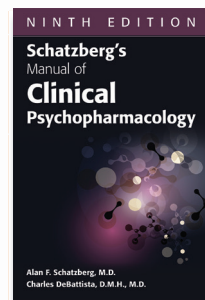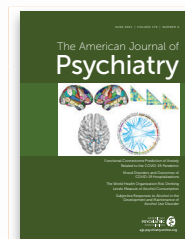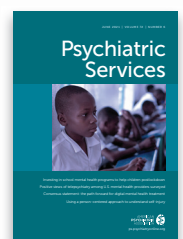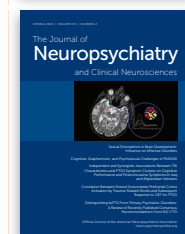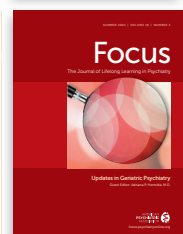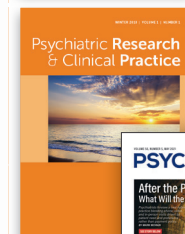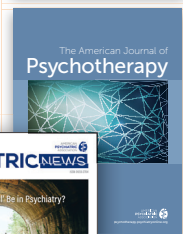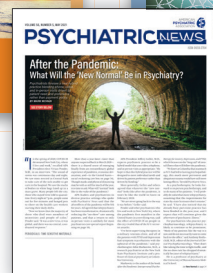

PsychiatryOnline.org is the platform for all American Psychiatric Association Publishing journals, DSM-5® (DSM-5-TR™ coming in March 2022), and bestselling textbooks, as well as APA Practice Guidelines, and continuing medical education.

This is a one-stop resource for information on psychiatric diagnosis, treatment, guidelines, the latest research, and breaking news from the field. From a single location, users can search across all books and journals to find the most relevant content easier than ever.

Subscribe to products individually or to the DSM Select package that includes the DSM-5® library, books and select journals.

**Go to [www.appi.org](http://www.appi.org) to subscribe.**

*Institutional subscription options are available.*

*For more information contact: [institutions@psych.org](mailto:institutions@psych.org); 800-368-5777 ext. 3729*

AMERICAN  
PSYCHIATRIC  
ASSOCIATION  
PUBLISHING

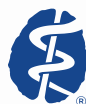

[psychiatryonline.org](http://psychiatryonline.org)

# ▶ PODCASTS from APA Publishing

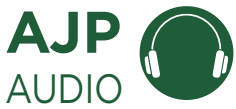

## AJP Audio

Host: Michael D. Roy, Executive Editor, *The American Journal of Psychiatry*

Each episode features an in-depth interview with an author from the most discussed article appearing in the latest issue of *The American Journal of Psychiatry*.

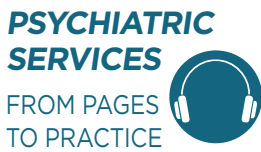

## Psychiatric Services From Pages to Practice

Hosts: Lisa Dixon, M.D., M.P.H., Editor, *Psychiatric Services*, and Josh Berezin, M.D., M.S.

Learn about the latest mental health services research published in *Psychiatric Services* and why it is relevant. Topics include community-based treatment programs, collaborative care, evidence-based treatment and service delivery, criminal and social justice, policy analysis, and more.

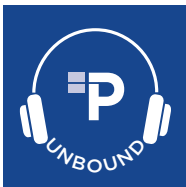

## Psychiatry Unbound

Host: Laura Roberts, M.D., M.A., Editor-in-Chief, APA Publishing Books

APA Publishing's Books podcast offers the opportunity to hear the voices behind the most prominent psychiatric scholarship in the field today. Learn about important topics in the field of psychiatry and see how our authors are making an impact in clinical settings throughout the world.

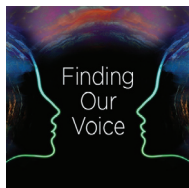

## Finding Our Voice

Host: Sanya Virani, MBBS, MPH

**Finding Our Voice** brings the viewpoints and opinions of the next generation of psychiatrists—including residents, fellows, and early career psychiatrists—to the forefront. Topics covered include systemic racism and social determinants.

Subscribe Today!

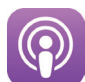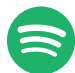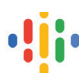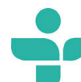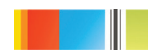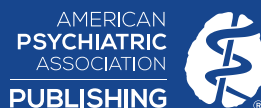

**Coming March 2022!**

## Diagnostic and Statistical Manual of Mental Disorders, Fifth Edition, Text Revision (DSM-5-TR™)

American Psychiatric Association

The *Diagnostic and Statistical Manual of Mental Disorders*, Fifth Edition, Text Revision (DSM-5-TR), is the most comprehensive, current, and critical resource for clinical practice available to today's mental health clinicians and researchers. DSM-5-TR includes the fully revised text and references, updated diagnostic criteria and ICD-10-CM codes since DSM-5 was published in 2013. It features a new disorder, Prolonged Grief Disorder, as well as codes for suicidal behavior available to all clinicians of any discipline without the requirement of any other diagnosis.

With contributions from over 200 subject matter experts, this updated volume boasts the most current text updates based on the scientific literature. Now in four-color and with the ability to authenticate each printed copy, DSM-5-TR provides a cohesive, updated presentation of criteria, diagnostic codes, and text. This latest volume offers a common language for clinicians involved in the diagnosis and study of mental disorders and facilitates an objective assessment of symptom presentations across a variety of clinical settings—inpatient, outpatient, partial hospital, consultation-liaison, clinical, private practice, and primary care.

2022 • 1,250 pages • ISBN 978-0-89042-575-6 • Hardcover • \$220.00 • Item #2575

2022 • 1,250 pages • ISBN 978-0-89042-576-3 • Paperback • \$170.00 • Item #2576

2022 • 1,250 pages • ISBN 978-0-89042-577-0 • eBook • \$136.00 • Item #2577

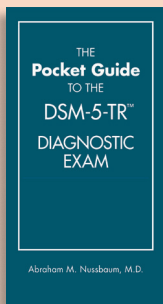

### The Pocket Guide to the DSM-5-TR® Diagnostic Exam

Abraham M. Nussbaum, M.D., M.T.S.

2022 • 295 pages  
ISBN 978-1-61537-357-4  
Paperback • \$75.00 • Item #37357

2022 • 295 pages  
ISBN 978-1-61537-358-1  
eBook • \$60.00 • Item #37358

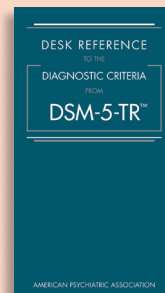

### Desk Reference to the Diagnostic Criteria from DSM-5-TR®

American Psychiatric Association

2022 • 450 pages  
ISBN 978-0-89042-579-4  
Paperback • \$75.00 • Item #2579

2022 • 450 pages  
ISBN 978-0-89042-580-0  
Spiralbound • \$75.00 • Item #2580

2022 • 450 pages  
ISBN 978-0-89042-581-7  
eBook • \$60.00 • Item #2581

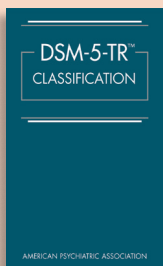

### DSM-5-TR® Classification

American Psychiatric Association

2022 • 150 pages  
ISBN 978-0-89042-583-1  
Spiralbound • \$35.00 • Item #2583

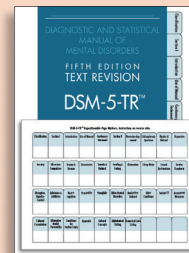

### DSM-5-TR® Repositionable Page Markers

American Psychiatric Association

2022 • 1 page  
ISBN 978-0-89042-582-4  
Repositionable Page Markers  
\$12.50 • Item #2582

AMERICAN  
PSYCHIATRIC  
ASSOCIATION  
PUBLISHING

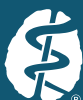

20% Discount for American Psychiatric Association Members

25% Discount for APA Resident-Fellow Members

► ORDER @ [www.appi.org](http://www.appi.org) | Email: [appi@psych.org](mailto:appi@psych.org) | Toll Free: 1-800-368-5777
