# Focus

The Journal of Lifelong Learning in Psychiatry

## The Best Resource for

- Clinical Synthesis
- Expert Guidance
- Lifelong Learning
- Maintenance of Certification

**Focus**, APA's quarterly clinical review journal, is designed for practicing psychiatrists to keep abreast of significant clinical knowledge and advances in the field through self-directed lifelong learning. Four issues each year provide comprehensive reviews of major clinical areas of psychiatry. **Focus** also provides an organized learning and self-assessment program with 44 hours of CME each year.

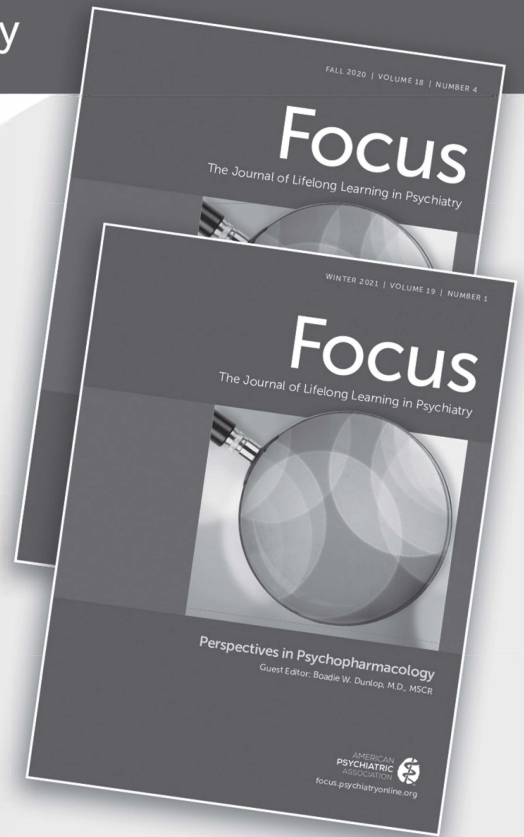

## An Annual Subscription to Focus Gives You:

- Reviews of core areas in psychiatry, with each issue overseen by a Guest Editor clinical expert in that area.
- Articles on best practices, new developments and the current state of practice.
- Quizzes that allow you to earn up to five *AMA PRA Category 1 Credits*<sup>™</sup> by completing CME questions for each issue—for a total of up to 20 CME credits per year.
- An annual 120-question **self-assessment exam** for an additional 24 CME credits and APBN MOC self-assessment credits that provides you with a comparison of your result against the group score of your peers.
- Online access to back issues (CME credits for issue quizzes available only for your subscription year).

[focus.psychiatryonline.org](http://focus.psychiatryonline.org)

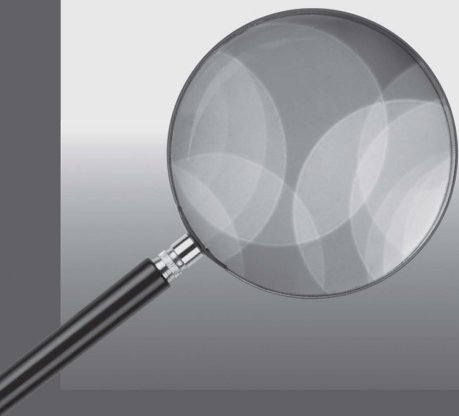

AMERICAN  
PSYCHIATRIC  
ASSOCIATION  
PUBLISHING

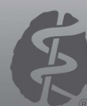

[www.appi.org](http://www.appi.org)  
1-800-368-5777  
[appi@psych.org](mailto:appi@psych.org)

Priority Code AH2126A

Searching for  
the perfect  
psychiatric  
career?

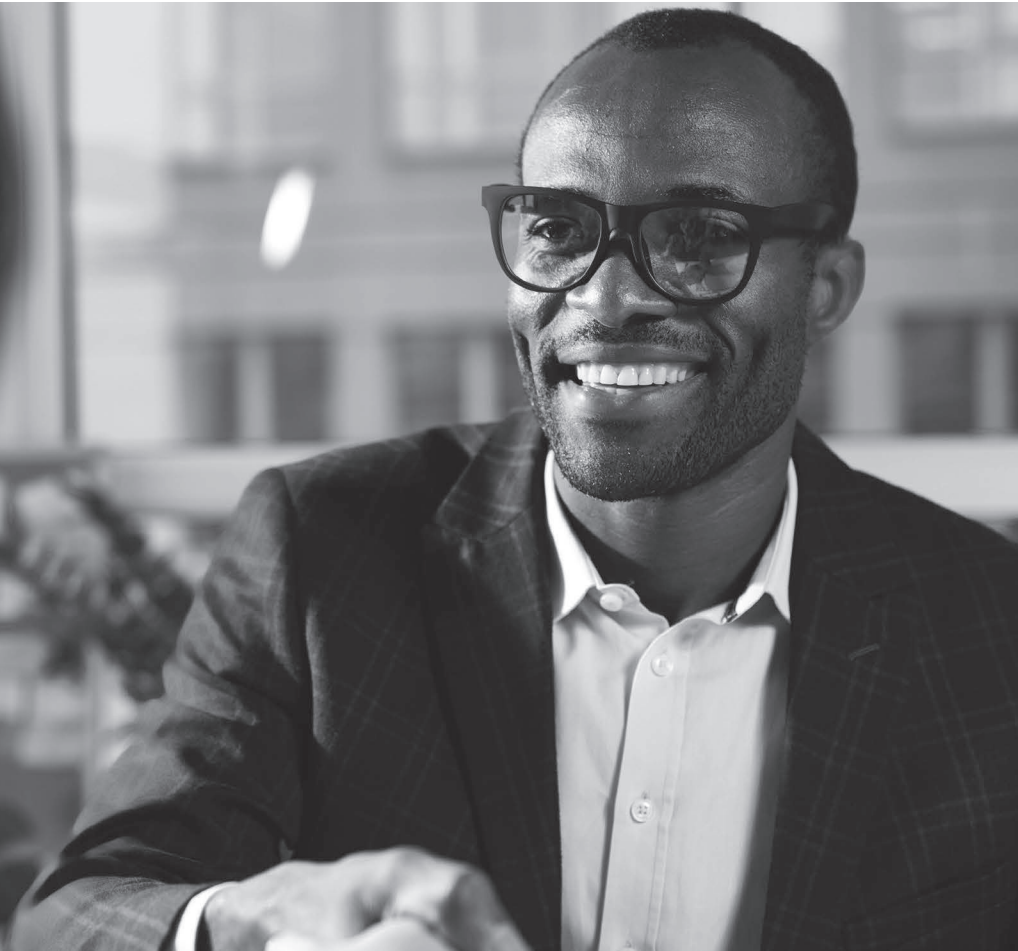

## Let APA JobCentral help!

### Manage Your Career

- Browse hundreds of active job listings!
- Create an account to save jobs, store multiple resumes and cover letters and communicate with employers through our internal messaging system.
- Set up multiple job alerts specifying your skills, interests and location to receive e-mails when employers post jobs that match your criteria.

### Recruit for Open Positions

- Post your job in front of thousands of highly qualified psychiatrists.
- Cross promote your job listing in Psychiatric News.
- Search the anonymous resume database to find your ideal candidate.

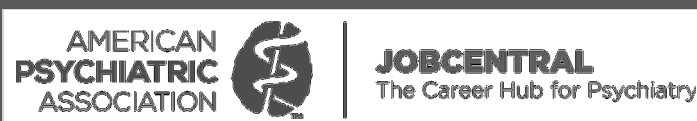

[jobs.psychiatry.org](http://jobs.psychiatry.org)
